# Supplementary material for: Structural Changes of Inner and Outer Choroid in Central Serous Chorioretinopathy Determined by Optical Coherence Tomography
Source: PubMed Central journal article supplement (PMC4909210; doi:10.1371/journal.pone.0157190), 2016-06-15
Supplement: pone.0157190.s001.pdf [file pone.0157190.s001.pdf]

## Supplementary Data

**S1 Table. Demographic findings of CSC eye and CSC fellow eye.**

| Case number | sex | age | CSC eye          |           |     | CSC fellow eye   |           |     |
|-------------|-----|-----|------------------|-----------|-----|------------------|-----------|-----|
|             |     |     | Refractive error | VA logMAR | IOP | Refractive error | VA logMAR | IOP |
| CSC-1       | m   | 36  | 0.5              | 0         | 13  | -0.5             | 0         | 12  |
| CSC-2       | f   | 37  | 0                | -0.18     | 16  | -2               | -0.17609  | 15  |
| CSC-3       | m   | 38  | -0.5             | 0.3       | 10  | -2.5             | 0.04576   | 11  |
| CSC-4       | m   | 39  | -0.5             | 0.22      | 18  | -3               | -0.07918  | 18  |
| CSC-5       | m   | 39  | 1.5              | 0.05      | 12  | -0.5             | -0.17609  | 11  |
| CSC-6       | m   | 40  | 0.75             | -0.08     | 13  | -1.25            | -0.17609  | 3   |
| CSC-7       | f   | 40  | -5               | -0.08     | 17  | -6               | 0         | 18  |
| CSC-8       | m   | 41  | -0.75            | -0.08     | 9   | -2               | -0.07918  | 10  |
| CSC-9       | m   | 41  | 1.25             | 0.05      | 13  | -0.5             | -0.17609  | 13  |
| CSC-10      | m   | 42  | 0.25             | -0.08     | 14  | -1               | 0         | 14  |
| CSC-11      | f   | 43  | -3.75            | -0.08     | 13  | -5.25            | -0.07918  | 13  |
| CSC-12      | m   | 43  | 0                | -0.08     | 10  | -0.5             | -0.17609  | 10  |
| CSC-13      | m   | 43  | 0                | -0.18     | 12  | -1               | -0.07918  | 11  |
| CSC-14      | f   | 44  | 0                | 0.7       | 13  | -0.25            | 0         | 16  |
| CSC-15      | m   | 45  | 1.5              | 0         | 8   | -0.25            | 0         | 10  |
| CSC-16      | m   | 47  | -0.5             | 0         | 16  | -0.5             | -0.17609  | 16  |
| CSC-17      | f   | 48  | -0.5             | 0.05      | 17  | -1.25            | -0.07918  | 16  |
| CSC-18      | f   | 50  | 0.5              | 0         | 13  | -0.5             | -0.17609  | 14  |
| CSC-19      | m   | 51  | 0.5              | -0.18     | 14  | -1               | -0.07918  | 12  |
| CSC-20      | m   | 54  | -1.75            | 0.15      | 11  | -1.75            | 0         | 14  |
| CSC-21      | m   | 60  | 0                | 0.4       | 10  | -1.5             | -0.07918  | 11  |

|        |   |    |       |       |    |  |       |          |    |
|--------|---|----|-------|-------|----|--|-------|----------|----|
| CSC-22 | m | 64 | 1.25  | 0.22  | 15 |  | -0.25 | -0.17609 | 11 |
| CSC-23 | m | 44 | 0.5   | 0.3   | 15 |  | 0     | -0.07918 | 14 |
| CSC-24 | m | 49 | -1    | 0.1   | 11 |  | -1.5  | 0        | 11 |
| CSC-25 | m | 50 | 0.5   | 0.05  | 10 |  | -0.25 | -0.07918 | 10 |
| CSC-26 | f | 52 | -1.5  | 0     | 13 |  | -1    | -0.07918 | 12 |
| CSC-27 | m | 50 | -0.25 | 0.22  | 14 |  | -1.25 | 0        | 12 |
| CSC-28 | m | 52 | 3     | 0.05  | 11 |  | 3.25  | -0.17609 | 12 |
| CSC-29 | m | 42 | 0.25  | -0.08 | 13 |  | 0.25  | -0.07918 | 15 |
| CSC-30 | f | 32 | 0     | -0.08 | 14 |  | -0.25 | -0.07918 | 14 |
| CSC-31 | m | 40 | -0.25 | 0     | 12 |  | -0.25 | 0        | 12 |
| CSC-32 | m | 47 | 0     | 0.1   | 10 |  | 0     | 0        | 10 |
| CSC-33 | f | 46 | 0     | -0.18 | 16 |  | -0.5  | -0.17609 | 15 |
| CSC-34 | m | 53 | -0.25 | 0     | 15 |  | -0.25 | 0        | 15 |
| CSC-35 | m | 36 | -1    | 0.22  | 13 |  | -1    | 0.04576  | 14 |
| CSC-36 | m | 56 | 1.25  | 0.05  | 11 |  | 0.75  | -0.07918 | 11 |
| CSC-37 | m | 33 | -1.5  | -0.18 | 12 |  | -2    | -0.17609 | 12 |
| CSC-38 | m | 39 | -0.75 | -0.18 | 12 |  | -2.5  | -0.17609 | 13 |
| CSC-39 | m | 71 | -0.5  | 0     | 12 |  | -2    | 0        | 14 |
| CSC-40 | m | 45 | 0.25  | 0     | 18 |  | -2    | -0.07918 | 18 |

CSC; Central serous choroiretinopathy,VA; visual acuity, IOP; intraocular pressure
