# Supplementary material for: Structural Changes of Inner and Outer Choroid in Central Serous Chorioretinopathy Determined by Optical Coherence Tomography
Source: PubMed Central journal article supplement (PMC4909210; doi:10.1371/journal.pone.0157190), 2016-06-15
Supplement: pone.0157190.s002.pdf [file pone.0157190.s002.pdf]

## Supplementary Data

**S2 Table. Demographic findings of control eye.**

| Case number | sex | age | Refractive error | VA logMAR | IOP |
|-------------|-----|-----|------------------|-----------|-----|
| C1          | m   | 36  | -1               | -0.18     | 12  |
| C2          | m   | 37  | -3.25            | -0.18     | 16  |
| C3          | m   | 38  | -4.5             | 0         | 19  |
| C4          | f   | 39  | -5.5             | -0.18     | 11  |
| C5          | f   | 39  | -3.25            | -0.18     | 12  |
| C6          | f   | 40  | -5               | -0.18     | 15  |
| C7          | m   | 40  | -1.75            | -0.18     | 14  |
| C8          | f   | 41  | -0.75            | -0.18     | 16  |
| C9          | m   | 41  | -2.25            | -0.18     | 10  |
| C10         | m   | 42  | -2               | -0.18     | 13  |
| C11         | f   | 43  | -3.5             | -0.08     | 14  |
| C12         | m   | 43  | -2               | -0.08     | 12  |
| C13         | f   | 43  | -2.5             | -0.3      | 14  |
| C14         | m   | 44  | -3               | -0.18     | 16  |
| C15         | m   | 45  | 0                | -0.18     | 12  |
| C16         | f   | 47  | -0.5             | -0.18     | 16  |
| C17         | f   | 48  | -1               | -0.18     | 15  |
| C18         | m   | 50  | -2.75            | -0.08     | 13  |
| C19         | f   | 51  | -1.75            | -0.3      | 14  |
| C20         | m   | 54  | -0.5             | -0.3      | 11  |

|     |   |    |       |       |    |
|-----|---|----|-------|-------|----|
| C21 | m | 60 | -4.25 | -0.18 | 16 |
| C22 | m | 64 | -2.25 | -0.18 | 13 |
| C23 | m | 44 | -2    | 0     | 14 |
| C24 | m | 49 | -1.5  | -0.18 | 11 |
| C25 | m | 51 | 2.5   | -0.18 | 10 |
| C26 | m | 52 | -0.5  | -0.18 | 12 |
| C27 | f | 50 | 0.25  | -0.18 | 10 |
| C28 | f | 52 | -1.25 | -0.08 | 15 |
| C29 | m | 44 | -2    | -0.08 | 13 |
| C30 | m | 32 | -0.75 | -0.18 | 13 |
| C31 | m | 41 | -4.25 | -0.18 | 12 |
| C32 | m | 47 | -4.75 | 0     | 15 |
| C33 | m | 45 | 0.5   | 0     | 18 |
| C34 | m | 53 | -3.25 | -0.18 | 12 |
| C35 | m | 36 | 0.75  | -0.08 | 10 |
| C36 | f | 55 | -4    | 0     | 13 |
| C37 | m | 33 | -5    | -0.18 | 11 |
| C38 | f | 40 | -3.5  | -0.08 | 11 |
| C39 | m | 71 | -0.25 | 0     | 12 |
| C40 | f | 45 | -3    | -0.18 | 12 |

CSC; Central serous choroiretinopathy,VA; visual acuity, IOP; intraocular pressure
