# Supplementary material for: Structural Changes of Inner and Outer Choroid in Central Serous Chorioretinopathy Determined by Optical Coherence Tomography
Source: PubMed Central journal article supplement (PMC4909210; doi:10.1371/journal.pone.0157190), 2016-06-15
Supplement: pone.0157190.s003.pdf [file pone.0157190.s003.pdf]

# Supplementary Data

**S3 Table. Choroidal area of CSC eye.**

| Case number | Whole choroid ( $\mu\text{m}^2$ ) |                      |                      | Inner Choroid ( $\mu\text{m}^2$ ) |                      |                      | Outer Choroid ( $\mu\text{m}^2$ ) |                      |                      | CSC index |
|-------------|-----------------------------------|----------------------|----------------------|-----------------------------------|----------------------|----------------------|-----------------------------------|----------------------|----------------------|-----------|
|             | choroid area                      | hypo-refractive area | hyperrefractive area | choroid area                      | hypo-refractive area | hyperrefractive area | choroid area                      | hypo-refractive area | hyperrefractive area |           |
| CSC-1       | 771700.446                        | 618049.9907          | 153650.4553          | 170040.7568                       | 122570.9498          | 47469.807            | 601659.6892                       | 495479.0409          | 106180.6483          | 1.8       |
| CSC-2       | 906701.526                        | 668741.7525          | 237959.7735          | 140119.104                        | 92601.648            | 47517.456            | 766582.422                        | 576140.1045          | 190442.3175          | 1.55      |
| CSC-3       | 543480.5086                       | 383474.2751          | 160006.2335          | 105273.288                        | 72076.11814          | 33197.16986          | 438207.2206                       | 311398.1569          | 126809.0637          | 1.13      |
| CSC-4       | 614785.7233                       | 480077.2153          | 134708.508           | 88112.2372                        | 64388.82773          | 23723.40947          | 526673.4861                       | 415688.3875          | 110985.0985          | 1.38      |
| CSC-5       | 844749.6373                       | 689772.6235          | 154977.0137          | 168609.6503                       | 125256.5747          | 43353.07555          | 676139.987                        | 564516.0488          | 111623.9382          | 1.75      |
| CSC-6       | 646543.485                        | 528844.2075          | 117699.2775          | 78019.2                           | 49330.89             | 28688.31             | 568524.285                        | 479513.3175          | 89010.9675           | 3.13      |
| CSC-7       | 734963.7358                       | 483960.754           | 251002.9818          | 112701.7727                       | 77711.16774          | 34990.605            | 622261.9631                       | 406249.5863          | 216012.3768          | 0.84      |
| CSC-8       | 636637.6397                       | 457949.5395          | 178688.1002          | 111078.9104                       | 82994.01573          | 28084.89464          | 525558.7293                       | 374955.5237          | 150603.2056          | 0.84      |
| CSC-9       | 912216.9919                       | 739262.106           | 172954.8859          | 164974.7137                       | 114243.6191          | 50731.0946           | 747242.2783                       | 625018.4869          | 122223.7913          | 2.27      |
| CSC-10      | 848047.1867                       | 600886.3076          | 247160.879           | 147797.7185                       | 97844.40883          | 49953.30966          | 700249.4682                       | 503041.8988          | 197207.5694          | 1.3       |
| CSC-11      | 678506.8599                       | 520900.7615          | 157606.0984          | 114035.5097                       | 84995.82303          | 29039.6867           | 564471.3501                       | 435904.9384          | 128566.4117          | 1.15      |
| CSC-12      | 849795.3431                       | 659732.5999          | 190062.7433          | 141019.2394                       | 90858.62174          | 50160.61766          | 708776.1037                       | 568873.9781          | 139902.1256          | 2.24      |
| CSC-13      | 1006772.76                        | 824455.125           | 182317.635           | 200119.248                        | 128052.495           | 72066.753            | 806653.512                        | 696402.63            | 110250.882           | 3.55      |
| CSC-14      | 503662.2335                       | 366703.8625          | 136958.3711          | 82500.35047                       | 42934.08953          | 39566.26093          | 421161.8831                       | 323769.7729          | 97392.11014          | 3.06      |
| CSC-15      | 638435.9899                       | 420528.3641          | 217907.6257          | 77337.75087                       | 50099.29774          | 27238.45314          | 561098.239                        | 370429.0664          | 190669.1726          | 1.56      |
| CSC-16      | 645592.1617                       | 463938.3863          | 181653.7753          | 126242.0313                       | 92424.888            | 33817.14332          | 519350.1303                       | 371513.4983          | 147836.632           | 0.91      |
| CSC-17      | 712058.4248                       | 507453.5953          | 204604.8296          | 99150.73503                       | 62768.18787          | 36382.54717          | 612907.6898                       | 444685.4074          | 168222.2824          | 1.53      |
| CSC-18      | 727744.2895                       | 511491.4373          | 216252.8522          | 119498.131                        | 83422.3777           | 36075.75333          | 608246.1585                       | 428069.0596          | 180177.0989          | 1.02      |
| CSC-19      | 516788.3445                       | 363690.0225          | 153098.322           | 122833.9162                       | 84947.1964           | 37886.71983          | 393954.4283                       | 278742.8261          | 115211.6022          | 1.07      |
| CSC-20      | 945140.7266                       | 701071.6301          | 244069.0965          | 100853.9029                       | 65851.146            | 35002.75687          | 844286.8238                       | 635220.4841          | 209066.3396          | 1.61      |
| CSC-21      | 824892.1253                       | 622766.6693          | 202125.456           | 87782.049                         | 47702.47133          | 40079.57767          | 737110.0763                       | 575064.198           | 162045.8783          | 2.98      |

|         |             |             |             |   |             |             |             |  |             |             |             |      |
|---------|-------------|-------------|-------------|---|-------------|-------------|-------------|--|-------------|-------------|-------------|------|
| CSC-22  | 597899.52   | 412901.0007 | 184998.5193 |   | 80552.94735 | 55375.77197 | 25177.17539 |  | 517346.5726 | 357525.2287 | 159821.3439 | 1.02 |
| CSC-23  | 875560.41   | 726890.9737 | 148669.4363 |   | 99007.758   | 60549.82633 | 38457.93167 |  | 776552.652  | 666341.1473 | 110211.5047 | 3.84 |
| CSC-24  | 859429.9792 | 571939.6568 | 287490.3224 |   | 77832.279   | 64264.79426 | 13567.48474 |  | 781597.7002 | 507674.8626 | 273922.8376 | 0.39 |
| CSC-25  | 644882.094  | 482810.093  | 162072.001  |   | 87141.98977 | 53262.15197 | 33879.8378  |  | 557740.1042 | 429547.941  | 128192.1632 | 2.13 |
| CSC-26  | 698883.6093 | 480414.7952 | 218468.8142 |   | 99814.73067 | 64189.1745  | 35625.55617 |  | 599068.8787 | 416225.6207 | 182843.258  | 1.26 |
| CSC-27  | 486410.8185 | 350810.082  | 135600.7365 |   | 99322.27283 | 60072.34583 | 39249.927   |  | 387088.5457 | 290737.7362 | 96350.8095  | 1.97 |
| CSC-28  | 567619.2467 | 428816.298  | 138802.9487 |   | 93012.50866 | 62210.79166 | 30801.717   |  | 474606.738  | 366605.5063 | 108001.2317 | 1.68 |
| CSC-29  | 706448.6081 | 551465.7893 | 154982.8189 |   | 89216.03854 | 58849.929   | 30366.10954 |  | 617232.5696 | 492615.8603 | 124616.7093 | 2.04 |
| CSC-30  | 474583.6727 | 329650.9347 | 144932.738  |   | 91171.47233 | 68712.624   | 22458.84833 |  | 383412.2003 | 260938.3107 | 122473.8896 | 0.69 |
| CSC-31  | 413998.0487 | 296876.0593 | 117121.9893 |   | 70818.98767 | 47712.22367 | 23106.764   |  | 343179.061  | 249163.8357 | 94015.22533 | 1.28 |
| CSC-32  | 1089315.429 | 810075.1727 | 279240.2561 |   | 97033.63206 | 71119.99627 | 25913.63579 |  | 992281.7967 | 738955.1764 | 253326.6203 | 1.06 |
| CSC-33  | 577151.6179 | 402660.8065 | 174490.8114 |   | 78466.20413 | 46986.0184  | 31480.18573 |  | 498685.4138 | 355674.7881 | 143010.6257 | 1.67 |
| CSC-34  | 795980.052  | 530017.398  | 265962.654  |   | 112476.906  | 74812.518   | 37664.388   |  | 683503.146  | 455204.88   | 228298.266  | 1    |
| CSC-35  | 560719.985  | 411050.1346 | 149669.8504 |   | 74970.414   | 45411.29597 | 29559.11803 |  | 485749.571  | 365638.8386 | 120110.7324 | 1.98 |
| CSC-36  | 488189.3543 | 403670.1023 | 84519.252   |   | 88805.664   | 57415.939   | 31389.725   |  | 399383.6903 | 346254.1633 | 53129.527   | 3.56 |
| CSC-37  | 675924.4477 | 459786.8438 | 216137.604  |   | 81452.12247 | 49631.43413 | 31820.68834 |  | 594472.3253 | 410155.4096 | 184316.9156 | 1.42 |
| CSC-38  | 720624.0824 | 544887.042  | 175737.0404 |   | 141769.938  | 96361.07607 | 45408.86197 |  | 578854.1443 | 448525.9659 | 130328.1784 | 1.62 |
| CSC-39  | 829122.748  | 579228.5773 | 249894.1706 |   | 134368.0807 | 91221.96699 | 43146.11367 |  | 694754.6673 | 488006.6103 | 206748.057  | 1.11 |
| CSC-40  | 512094.1121 | 413111.8383 | 98982.27386 |   | 109102.7109 | 77619.3514  | 31483.35947 |  | 402991.4013 | 335492.4869 | 67498.9144  | 2.02 |
|         |             |             |             |   |             |             |             |  |             |             |             |      |
| average | 702101.3494 | 520020.3706 | 182080.9788 | # | 109110.9218 | 73471.35109 | 35639.57073 |  | 592990.4275 | 446549.0195 | 146441.408  | 1.7  |
| SD      | 160651.9064 | 132420.0951 | 49484.13248 | # | 30664.77349 | 22797.27463 | 10229.34473 |  | 146632.167  | 121214.2774 | 49822.1854  | 0.83 |

CSC. Central serous choroiretinopathy.
