# Supplementary material for: Structural Changes of Inner and Outer Choroid in Central Serous Chorioretinopathy Determined by Optical Coherence Tomography
Source: PubMed Central journal article supplement (PMC4909210; doi:10.1371/journal.pone.0157190), 2016-06-15
Supplement: pone.0157190.s004.pdf [file pone.0157190.s004.pdf]

# Supplementary Data

## S4 Table. Choroidal area of CSC fellow eye.

| Case number | Whole choroid ( $\mu\text{m}^2$ ) |                      |                      | Inner Choroid ( $\mu\text{m}^2$ ) |                      |                      | Outer Choroid ( $\mu\text{m}^2$ ) |                      |                      | CSC index |
|-------------|-----------------------------------|----------------------|----------------------|-----------------------------------|----------------------|----------------------|-----------------------------------|----------------------|----------------------|-----------|
|             | choroid area                      | hypo-refractive area | hyperrefractive area | choroid area                      | hypo-refractive area | hyperrefractive area | choroid area                      | hypo-refractive area | hyperrefractive area |           |
| CSC-1       | 495787.8091                       | 350142.449           | 145645.3601          | 124218.4087                       | 104456.389           | 19762.01969          | 371569.4004                       | 245686.0599          | 125883.3404          | 0.37      |
| CSC-2       | 483101.775                        | 348563.16            | 134538.615           | 151806.555                        | 114756.1425          | 37050.4125           | 331295.22                         | 233807.0175          | 97488.2025           | 0.77      |
| CSC-3       | 444163.9246                       | 330299.2366          | 113864.688           | 82912.73753                       | 66589.89337          | 16322.84416          | 361251.1871                       | 263709.3432          | 97541.84384          | 0.66      |
| CSC-4       | 307988.2999                       | 205558.7844          | 102429.5155          | 87396.86793                       | 68817.19159          | 18579.67634          | 220591.4319                       | 136741.5928          | 83849.83914          | 0.44      |
| CSC-5       | 803531.583                        | 638453.637           | 165077.946           | 157683.15                         | 117033.5215          | 40649.62853          | 645848.433                        | 521420.1155          | 124428.3175          | 1.46      |
| CSC-6       | 656450.8785                       | 504979.0785          | 151471.8             | 75627.42916                       | 60244.0345           | 15383.39466          | 580823.4493                       | 444735.044           | 136088.4053          | 0.83      |
| CSC-7       | 752300.4842                       | 578338.9726          | 173961.5116          | 89125.84847                       | 71569.0904           | 17556.75807          | 663174.6357                       | 506769.8822          | 156404.7535          | 0.79      |
| CSC-8       | 686474.0096                       | 519630.6857          | 166843.3239          | 106107.834                        | 73556.21916          | 32551.61487          | 580366.1755                       | 446074.4665          | 134291.709           | 1.47      |
| CSC-9       | 511147.5683                       | 348869.4512          | 162278.1171          | 128340.4616                       | 101769.1188          | 26571.3428           | 382807.1067                       | 247100.3324          | 135706.7743          | 0.48      |
| CSC-10      | 534737.2114                       | 412730.8171          | 122006.3943          | 102627.6396                       | 79561.28974          | 23066.34988          | 432109.5718                       | 333169.5274          | 98940.04446          | 0.98      |
| CSC-11      | 651855.8144                       | 459791.3524          | 192064.4619          | 102357.7075                       | 77820.08156          | 24537.62598          | 549498.1068                       | 381971.2709          | 167526.836           | 0.72      |
| CSC-12      | 699532.5311                       | 490522.6549          | 209009.8763          | 149167.602                        | 106016.328           | 43151.274            | 550364.9291                       | 384506.3269          | 165858.6023          | 0.94      |
| CSC-13      | 917061.3609                       | 770137.7982          | 146923.5627          | 126531.6429                       | 99003.58835          | 27528.05454          | 790529.718                        | 671134.2099          | 119395.5081          | 1.56      |
| CSC-14      | 314766.837                        | 200450.4232          | 114316.4138          | 76143.89483                       | 52587.7855           | 23556.10933          | 238622.9422                       | 147862.6377          | 90760.3045           | 0.73      |
| CSC-15      | 609394.2132                       | 393185.4789          | 216208.7343          | 87119.81486                       | 59959.2064           | 27160.60845          | 522274.3983                       | 333226.2725          | 189048.1258          | 0.79      |
| CSC-16      | 526156.495                        | 358424.6375          | 167731.8575          | 115158.1965                       | 86075.835            | 29082.3615           | 410998.2985                       | 272348.8025          | 138649.496           | 0.66      |
| CSC-17      | 525230.5195                       | 369716.604           | 155513.9155          | 89098.1665                        | 69338.858            | 19759.3085           | 436132.353                        | 300377.746           | 135754.607           | 0.63      |
| CSC-18      | 706240.462                        | 549508.408           | 156732.054           | 88519.2705                        | 76420.432            | 12098.8385           | 617721.1915                       | 473087.976           | 144633.2155          | 0.52      |
| CSC-19      | 764919.304                        | 585050.0985          | 179869.2055          | 90185.8475                        | 69103.158            | 21082.6895           | 674733.4565                       | 515946.9405          | 158786.516           | 0.99      |
| CSC-20      | 486725.8305                       | 315258.9525          | 171466.878           | 98716.541                         | 75740.3845           | 22976.1565           | 388009.2895                       | 239518.568           | 148490.7215          | 0.49      |
| CSC-21      | 807600.483                        | 666685.885           | 140914.598           | 95090.495                         | 65425.418            | 29665.077            | 712509.988                        | 601260.467           | 111249.521           | 2.45      |

|         |             |             |             |   |             |             |             |   |             |             |             |      |
|---------|-------------|-------------|-------------|---|-------------|-------------|-------------|---|-------------|-------------|-------------|------|
| CSC-22  | 693693.4755 | 529523.485  | 164169.9905 |   | 115003.1145 | 89036.0975  | 25967.017   |   | 578690.361  | 440487.3875 | 138202.9735 | 0.93 |
| CSC-23  | 647045.284  | 495911.749  | 151133.535  |   | 83053.772   | 63688.099   | 19365.673   |   | 563991.512  | 432223.65   | 131767.862  | 1    |
| CSC-24  | 553692.713  | 400954.383  | 152738.33   |   | 109619.358  | 79406.268   | 30213.09    |   | 444073.355  | 321548.115  | 122525.24   | 0.99 |
| CSC-25  | 368931.1425 | 236633.0605 | 132298.082  |   | 71515.4735  | 56414.0665  | 15101.407   |   | 297415.669  | 180218.994  | 117196.675  | 0.41 |
| CSC-26  | 562015.8575 | 382726.518  | 179289.3395 |   | 83720.5355  | 80205.267   | 3515.2685   |   | 478295.322  | 302521.251  | 175774.071  | 0.08 |
| CSC-27  | 433577.075  | 289738.2295 | 143838.8455 |   | 55789.6205  | 48389.408   | 7400.2125   |   | 377787.4545 | 241348.8215 | 136438.633  | 0.27 |
| CSC-28  | 396555.1955 | 273703.049  | 122852.1465 |   | 77126.1     | 53337.9365  | 23788.1635  |   | 319429.0955 | 220365.1125 | 99063.983   | 0.99 |
| CSC-29  | 722249.8295 | 578591.9505 | 143657.879  |   | 93876.1295  | 68409.61    | 25466.5195  |   | 628373.7    | 510182.3405 | 118191.3595 | 1.61 |
| CSC-30  | 865898.126  | 733914.818  | 131983.308  |   | 105827.612  | 78313.747   | 27513.865   |   | 760070.514  | 655601.071  | 104469.443  | 2.2  |
| CSC-31  | 584498.5115 | 431617.791  | 152880.7205 |   | 87625.14    | 74521.0785  | 13104.0615  |   | 496873.3715 | 357096.7125 | 139776.659  | 0.45 |
| CSC-32  | 657640.0095 | 446927.099  | 210712.9105 |   | 81697.306   | 67626.1045  | 14071.2015  |   | 575942.7035 | 379300.9945 | 196641.709  | 0.4  |
| CSC-33  | 394706.221  | 253040.128  | 141666.093  |   | 72337.1555  | 50813.2375  | 21523.918   |   | 322369.0655 | 202226.8905 | 120142.175  | 0.71 |
| CSC-34  | 343215.807  | 253697.8105 | 89517.9965  |   | 57408.037   | 47078.1755  | 10329.8615  |   | 285807.77   | 206619.635  | 79188.135   | 0.57 |
| CSC-35  | 474091.7625 | 356343.6265 | 117748.136  |   | 62958.394   | 48657.718   | 14300.676   |   | 411133.3685 | 307685.9085 | 103447.46   | 0.87 |
| CSC-36  | 419331.8444 | 296984.522  | 122347.3224 |   | 82419.03614 | 55286.84044 | 27132.1957  |   | 336912.8082 | 241697.6815 | 95215.12669 | 1.25 |
| CSC-37  | 691882.9214 | 530175.1631 | 161707.7583 |   | 74620.51037 | 42548.53862 | 32071.97175 |   | 617262.411  | 487626.6245 | 129635.7865 | 2.84 |
| CSC-38  | 564542.6274 | 396467.442  | 168075.1854 |   | 111378.8963 | 85546.86346 | 25832.03281 |   | 453163.7312 | 310920.5786 | 142243.1526 | 0.66 |
| CSC-39  | 735395.8576 | 526232.5519 | 209163.3057 |   | 131758.4274 | 100027.7654 | 31730.66196 |   | 603637.4302 | 426204.7865 | 177432.6437 | 0.76 |
| CSC-40  | 439172.5174 | 321561.7468 | 117610.7706 |   | 87530.65468 | 67710.77034 | 19819.88434 |   | 351641.8627 | 253850.9765 | 97790.88625 | 0.76 |
|         |             |             |             |   |             |             |             |   |             |             |             |      |
| average | 580832.6043 | 428276.0922 | 152556.5121 | # | 96730.0346  | 73821.53894 | 22908.49566 | # | 484102.5697 | 354454.5533 | 129648.0164 | 0.91 |
| SD      | 155546.5508 | 141512.3523 | 29996.22461 | # | 24579.39683 | 19007.52537 | 8521.641405 | # | 146469.8035 | 135816.089  | 28847.02916 | 0.57 |

CSC. Central serous choroiretinopathy.
