# Supplementary material for: Structural Changes of Inner and Outer Choroid in Central Serous Chorioretinopathy Determined by Optical Coherence Tomography
Source: PubMed Central journal article supplement (PMC4909210; doi:10.1371/journal.pone.0157190), 2016-06-15
Supplement: pone.0157190.s005.pdf [file pone.0157190.s005.pdf]

# Supplementary Data

## S5 Table. Choroidal area of control eye.

| Case number | Whole choroid ( $\mu\text{m}^2$ ) |                      |                      | Inner Choroid ( $\mu\text{m}^2$ ) |                      |                      | Outer Choroid ( $\mu\text{m}^2$ ) |                      |                      | CSC index |
|-------------|-----------------------------------|----------------------|----------------------|-----------------------------------|----------------------|----------------------|-----------------------------------|----------------------|----------------------|-----------|
|             | choroid area                      | hypo-refractive area | hyperrefractive area | choroid area                      | hypo-refractive area | hyperrefractive area | choroid area                      | hypo-refractive area | hyperrefractive area |           |
| C1          | 603550.8423                       | 456474.627           | 147076.215           | 79396.72667                       | 62816.1566           | 16580.57007          | 524154.1156                       | 393658.4704          | 130495.6452          | 0.79      |
| C2          | 318246.354                        | 209629.773           | 108616.581           | 85189.923                         | 64685.889            | 20504.034            | 233056.431                        | 144943.884           | 88112.547            | 0.52      |
| C3          | 536532.93                         | 355725.6479          | 180807.282           | 119398.9815                       | 89329.0815           | 30069.9              | 417133.9485                       | 266396.5664          | 150737.3821          | 0.59      |
| C4          | 580092.6053                       | 353737.3914          | 226355.214           | 95656.08448                       | 72761.37832          | 22894.70616          | 484436.5209                       | 280976.013           | 203460.5078          | 0.43      |
| C5          | 559999.5263                       | 380510.784           | 179488.742           | 101068.3009                       | 69102.72             | 31965.58087          | 458931.2254                       | 311408.064           | 147523.1614          | 0.98      |
| C6          | 512718.0723                       | 350304.273           | 162413.799           | 88405.85427                       | 70464.53427          | 17941.32             | 424312.218                        | 279839.7387          | 144472.4793          | 0.49      |
| C7          | 338732.4892                       | 240921.1418          | 97811.3473           | 68629.806                         | 54987.08834          | 13642.71766          | 270102.6832                       | 185934.0535          | 84168.62968          | 0.55      |
| C8          | 656236.8287                       | 413407.9725          | 242828.856           | 136079.4167                       | 107240.796           | 28838.62073          | 520157.412                        | 306167.1765          | 213990.2355          | 0.38      |
| C9          | 282475.6538                       | 169203.2692          | 113272.385           | 93829.40751                       | 64488.61583          | 29340.79168          | 188646.2463                       | 104714.6533          | 83931.59298          | 0.57      |
| C10         | 295561.188                        | 203365.5973          | 92195.5907           | 87583.42117                       | 65550.15683          | 22033.26434          | 207977.7668                       | 137815.4405          | 70162.32631          | 0.66      |
| C11         | 659848.545                        | 482035.5514          | 177812.994           | 112676.6751                       | 75743.02093          | 36933.6542           | 547171.8699                       | 406292.5305          | 140879.3394          | 1.41      |
| C12         | 475996.5326                       | 322843.6043          | 153152.928           | 92722.104                         | 79667.20086          | 13054.90314          | 383274.4286                       | 243176.4034          | 140098.0252          | 0.28      |
| C13         | 455089.7087                       | 318083.6593          | 137006.049           | 87962.31347                       | 66491.5538           | 21470.75967          | 367127.3953                       | 251592.1055          | 115535.2898          | 0.7       |
| C14         | 343658.9605                       | 230265.3676          | 113393.593           | 98070.13428                       | 71971.60888          | 26098.5254           | 245588.8263                       | 158293.7587          | 87295.06753          | 0.66      |
| C15         | 340236.7003                       | 222095.662           | 118141.038           | 95438.03149                       | 71359.08467          | 24078.94682          | 244798.6688                       | 150736.5773          | 94062.0915           | 0.54      |
| C16         | 517684.8845                       | 340899.6187          | 176785.266           | 97418.48832                       | 60685.85997          | 36732.62835          | 420266.3962                       | 280213.7587          | 140052.6374          | 1.21      |
| C17         | 349324.1322                       | 220982.7337          | 128341.399           | 64094.37027                       | 48894.03833          | 15200.33194          | 285229.7619                       | 172088.6953          | 113141.0666          | 0.47      |
| C18         | 590088.9683                       | 389712.2569          | 200376.711           | 79991.65527                       | 67382.91686          | 12608.73841          | 510097.313                        | 322329.34            | 187767.9729          | 0.32      |
| C19         | 290359.4037                       | 174270.1869          | 116089.217           | 65448.92852                       | 51379.40551          | 14069.52301          | 224910.4752                       | 122890.7814          | 102019.6938          | 0.33      |
| C20         | 281397.7187                       | 194924.1723          | 86473.5464           | 67707.62543                       | 57869.18128          | 9838.444153          | 213690.0933                       | 137054.991           | 76635.10224          | 0.3       |
| C21         | 237766.8557                       | 150134.6871          | 87632.1686           | 68424.51024                       | 59020.29885          | 9404.211394          | 169342.3454                       | 91114.38823          | 78227.95721          | 0.19      |

|         |             |             |            |             |             |             |             |             |             |      |
|---------|-------------|-------------|------------|-------------|-------------|-------------|-------------|-------------|-------------|------|
| C22     | 523392.4163 | 372318.2665 | 151074.15  | 84901.90515 | 73019.1726  | 11882.73255 | 438490.5111 | 299299.0939 | 139191.4172 | 0.35 |
| C23     | 476684.1604 | 384391.7563 | 92292.4041 | 81148.40157 | 61346.53399 | 19801.86758 | 395535.7588 | 323045.2223 | 72490.53651 | 1.44 |
| C24     | 595888.4143 | 470791.6487 | 125096.766 | 73999.65094 | 54899.38035 | 19100.27059 | 521888.7633 | 415892.2684 | 105996.495  | 1.37 |
| C25     | 580149.8793 | 395618.8678 | 184531.012 | 84877.75661 | 62009.36275 | 22868.39385 | 495272.1227 | 333609.505  | 161662.6177 | 0.76 |
| C26     | 393526.6157 | 268509.7642 | 125016.852 | 72308.38032 | 61227.23904 | 11081.14128 | 321218.2354 | 207282.5251 | 113935.7102 | 0.33 |
| C27     | 579806.7437 | 417022.8406 | 162783.903 | 101128.5802 | 76565.99968 | 24562.58048 | 478678.1635 | 340456.841  | 138221.3226 | 0.79 |
| C28     | 396597.2285 | 287900.879  | 108696.349 | 95628.412   | 78001.36704 | 17627.04496 | 300968.8165 | 209899.512  | 91069.30448 | 0.52 |
| C29     | 189569.9376 | 116809.6032 | 72760.3344 | 85150.5264  | 65304.8568  | 19845.6696  | 104419.4112 | 51504.7464  | 52914.6648  | 0.3  |
| C30     | 415162.6218 | 284895.8394 | 130266.782 | 84330.95328 | 56800.6896  | 27530.26368 | 330831.6685 | 228095.1498 | 102736.5187 | 1.08 |
| C31     | 394083.3382 | 269928.6922 | 124154.646 | 76760.76896 | 59772.55232 | 16988.21664 | 317322.5693 | 210156.1398 | 107166.4294 | 0.56 |
| C32     | 598915.7821 | 398238.4182 | 200677.364 | 76544.35872 | 60118.80928 | 16425.54944 | 522371.4234 | 338119.609  | 184251.8144 | 0.5  |
| C33     | 567232.7976 | 370543.4971 | 196689.301 | 108510.6636 | 70020.33731 | 38490.32631 | 458722.134  | 300523.1598 | 158198.9742 | 1.04 |
| C34     | 649256.4634 | 443300.4502 | 205956.013 | 76517.60881 | 56450.32784 | 20067.28097 | 572738.8546 | 386850.1224 | 185888.7321 | 0.74 |
| C35     | 426687.4136 | 294159.9134 | 132527.5   | 96029.17066 | 78195.4864  | 17833.68425 | 330658.2429 | 215964.427  | 114693.8159 | 0.43 |
| C36     | 360959.4138 | 211006.2144 | 149953.199 | 75783.76416 | 50402.92966 | 25380.8345  | 285175.6496 | 160603.2847 | 124572.3649 | 0.65 |
| C37     | 255591.9396 | 167375.853  | 88216.0866 | 73513.40544 | 64102.80384 | 9410.6016   | 182078.5341 | 103273.0492 | 78805.48499 | 0.19 |
| C38     | 434391.0525 | 304792.4925 | 129598.56  | 62240.2425  | 50112.63    | 12127.6125  | 372150.81   | 254679.8625 | 117470.9475 | 0.52 |
| C39     | 489627.5816 | 331798.0295 | 157829.552 | 127403.709  | 94620.76461 | 32782.94435 | 362223.8727 | 237177.2649 | 125046.6078 | 0.66 |
| C40     | 161949.6317 | 98896.01149 | 63053.6202 | 43869.48974 | 35765.41958 | 8104.070165 | 118080.1419 | 63130.59192 | 54949.55001 | 0.26 |
| average | 442876.8083 | 301695.6754 | 141181.133 | 86646.01267 | 66015.68123 | 20630.33143 | 356230.7956 | 235679.9941 | 120550.8015 | 0.62 |
| SD      | 137152.8635 | 101640.4983 | 43338.5554 | 18200.36709 | 12998.31643 | 8128.139631 | 128927.8932 | 97351.76974 | 40045.35074 | 0.33 |
